# Supplementary material for: Deep experimental profiling of microRNA diversity, deployment, and evolution across the Drosophila genus
Source: HighWire-hosted journal article supplement (doi:10.1101/gr.226068.117), 2017-12-12
Supplement: Supplemental_Fig_S5.pdf [file Supplemental_Fig_S5.pdf]

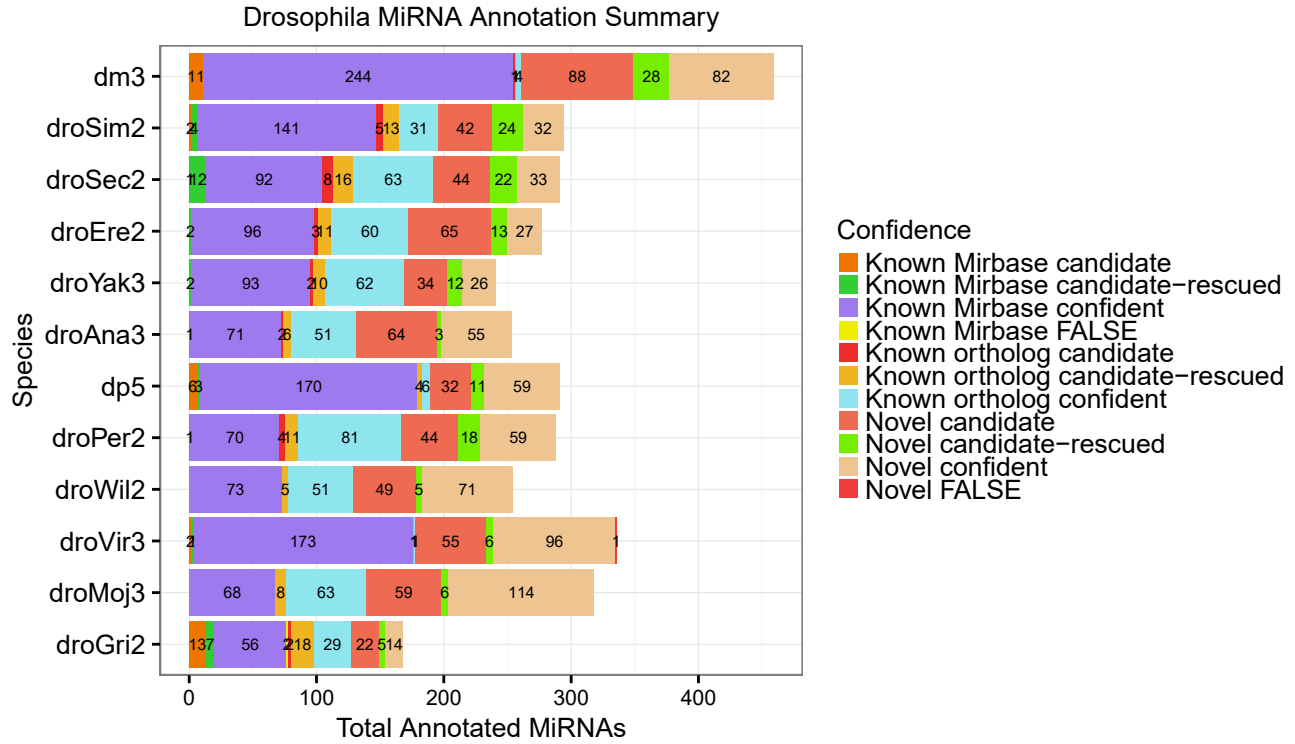

Supplementary Figure S5: Total miRNA and mirtron annotation count within 12 *Drosophila* species. Annotations are further subdivided within (1) three confidence categories- “confident”, “candidate-rescued”, and candidate”, and (2) between known and novel annotations. Note that “candidate” annotations were not utilized for analyses of miRNA flux in this study.
