# Supplementary material for: Deep experimental profiling of microRNA diversity, deployment, and evolution across the Drosophila genus
Source: HighWire-hosted journal article supplement (doi:10.1101/gr.226068.117), 2017-12-12
Supplement: Supplemental_Fig_S16.pdf [file Supplemental_Fig_S16.pdf]

*D. pseudoobscura*

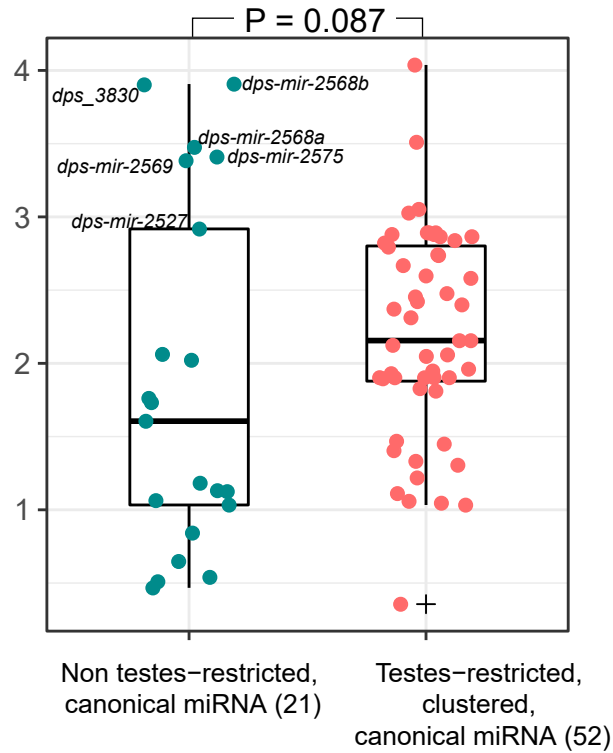

Supplementary Figure S16: Expression difference between *D. pseudoobscura*-specific or obscura-group-specific TRC and solo canonical miRNAs. Points reflect the maximum expression per locus assessed over all *D. pseudoobscura* libraries. P-value computed from two-tailed Wilcoxon Rank Sum Test.
