# Supplementary material for: Deep experimental profiling of microRNA diversity, deployment, and evolution across the Drosophila genus
Source: HighWire-hosted journal article supplement (doi:10.1101/gr.226068.117), 2017-12-12
Supplement: Supplemental_Table_S1.xlsx [file Supplemental_Table_S1.xlsx]

## Sheet: TableS1_Internal_Libraries
Library ID	Pubmed ID	GEO ID	Species	Tissue	mapped	mapped_unique	mapped_perfect	unmapped	total	mapped_per	mapped_unique_per	mapped_perfect_per	unmapped_per
V105			D. ananassae	male body	24986417	9600276	16975126	3699763	28686180	87.1	33.47	59.18	12.9
V106			D. ananassae	head	22882438	11675207	16852714	3195909	26078347	87.74	44.77	64.62	12.26
V055			D. ananassae	head	7704933	4076841	4920095	2795574	10500507	73.38	38.83	46.86	26.62
V039			D. ananassae	embryo	3739593	1298526	2508301	1588267	5327860	70.19	24.37	47.08	29.81
M044			D. ananassae	female body	46445531	22741895	31371498	6270784	52716315	88.1	43.14	59.51	11.9
M058			D. ananassae	embryo	36834337	7452098	25160822	1096658	37930995	97.11	19.65	66.33	2.89
V108			D. erecta	head	27183577	17626182	22417973	766817	27950394	97.26	63.06	80.21	2.74
V107	24942624	GSM1357621	D. erecta	male body	25037433	13562646	21203648	2444880	27482313	91.1	49.35	77.15	8.9
V040			D. erecta	embryo	4048271	1562156	3073300	1274764	5323035	76.05	29.35	57.74	23.95
V060			D. erecta	head	3240845	2602606	2682453	411736	3652581	88.73	71.25	73.44	11.27
M055			D. erecta	female body	46208800	22585454	38552249	1211397	47420197	97.45	47.63	81.3	2.55
M057			D. erecta	embryo	16638398	2881179	12228960	199692	16838090	98.81	17.11	72.63	1.19
V109			D. grimshawi	male body	28029122	7465959	22842103	3995761	32024883	87.52	23.31	71.33	12.48
M041			D. grimshawi	female body	41868937	13636164	35531289	5756204	47625141	87.91	28.63	74.61	12.09
V110			D. mojavensis	male body	23781713	10393251	18518461	4852962	28634675	83.05	36.3	64.67	16.95
V056			D. mojavensis	head	5376660	4335582	4283673	970586	6347246	84.71	68.31	67.49	15.29
V049			D. mojavensis	head	3700721	3031988	2729022	742021	4442742	83.3	68.25	61.43	16.7
V041			D. mojavensis	embryo	3209126	2099234	2767633	547276	3756402	85.43	55.88	73.68	14.57
M046			D. mojavensis	female body	55106163	29117988	48469450	5064472	60170635	91.58	48.39	80.55	8.42
M060			D. mojavensis	embryo	36111505	17149960	25656094	855834	36967339	97.68	46.39	69.4	2.32
V111			D. persimilis	male body	26053406	9292429	22608011	1658211	27711617	94.02	33.53	81.58	5.98
V042			D. persimilis	embryo	3175748	756470	2707075	495016	3670764	86.51	20.61	73.75	13.49
V050			D. persimilis	head	3018836	2309883	2581389	193949	3212785	93.96	71.9	80.35	6.04
V057			D. persimilis	head	6990119	5205447	4818071	2315479	9305598	75.12	55.94	51.78	24.88
M021			D. persimilis	embryo	14285904	3625736	12463036	481510	14767414	96.74	24.55	84.4	3.26
M042			D. persimilis	female body	24674344	11014808	19582569	2708338	27382682	90.11	40.23	71.51	9.89
V112			D. pseudoobscura	male body	13328457	5374028	7959735	5702485	19030942	70.04	28.24	41.83	29.96
V043			D. pseudoobscura	embryo	5387295	2330793	4334228	1203872	6591167	81.74	35.36	65.76	18.26
V051			D. pseudoobscura	head	4246644	3288325	3566782	287861	4534505	93.65	72.52	78.66	6.35
M022			D. pseudoobscura	male body	744862	310461	506521	475474	1220336	61.04	25.44	41.51	38.96
M040			D. pseudoobscura	female body	98484687	39672760	67808954	24035339	122520026	80.38	32.38	55.35	19.62
M059			D. pseudoobscura	embryo	17188609	4503353	11987690	299064	17487673	98.29	25.75	68.55	1.71
M062			D. pseudoobscura	head	8753249	5213113	6301601	151647	8904896	98.3	58.54	70.77	1.7
V113	24942624	GSM1357619	D. sechellia	male body	24997882	12690339	19095766	6513622	31511504	79.33	40.27	60.6	20.67
V115			D. sechellia	head	19541703	11208566	16098203	1890323	21432026	91.18	52.3	75.11	8.82
V114			D. sechellia	embryo	19037300	8350348	15153341	863082	19900382	95.66	41.96	76.15	4.34
M054			D. sechellia	female body	29681881	11691072	19170457	5780503	35462384	83.7	32.97	54.06	16.3
V044	24942624	GSM1357618	D. simulans	embryo	4415772	2247432	3577931	642799	5058571	87.29	44.43	70.73	12.71
M023			D. simulans	head	23851311	18291917	19954313	742656	24593967	96.98	74.38	81.13	3.02
M024			D. simulans	male body	17495420	9962069	13056798	3791082	21286502	82.19	46.8	61.34	17.81
M025			D. simulans	embryo	14523075	8194800	12365443	276190	14799265	98.13	55.37	83.55	1.87
M053			D. simulans	female body	23871107	8376491	19478575	1780969	25652076	93.06	32.65	75.93	6.94
O001			D. simulans	testis	37367702	14408026	33758328	568641	37936343	98.5	37.98	88.99	1.5
O002			D. simulans	head	15942885	10272088	14744752	160661	16103546	99	63.79	91.56	1
V116			D. virilis	male body	20557619	9711583	14800604	11245260	31802879	64.64	30.54	46.54	35.36
V053			D. virilis	head	6587654	4916012	3855328	1593775	8181429	80.52	60.09	47.12	19.48
V047			D. virilis	embryo	3223792	1279944	2361992	1199519	4423311	72.88	28.94	53.4	27.12
M027			D. virilis	male body	10735670	6512303	5491117	4606852	15342522	69.97	42.45	35.79	30.03
M028			D. virilis	head	7219939	4319052	3564922	962985	8182924	88.23	52.78	43.57	11.77
M047			D. virilis	female body	42682720	21952041	29446455	6891880	49574600	86.1	44.28	59.4	13.9
M061			D. virilis	embryo	9062550	2358222	6074854	517420	9579970	94.6	24.62	63.41	5.4
V117			D. willistoni	male body	29625068	7133487	24443640	3393372	33018440	89.72	21.6	74.03	10.28
V118			D. willistoni	embryo	31867130	14179347	27781155	585223	32452353	98.2	43.69	85.61	1.8
V119			D. willistoni	head	26759330	13142128	22700222	661276	27420606	97.59	47.93	82.79	2.41
M020			D. willistoni	head	19693277	12987005	16841739	1101396	20794673	94.7	62.45	80.99	5.3
M045			D. willistoni	female body	39296471	15099270	27525907	14018647	53315118	73.71	28.32	51.63	26.29
V058			D. yakuba	head	6001276	4303994	4567848	1424860	7426136	80.81	57.96	61.51	19.19
V120	24942624	GSM1357620	D. yakuba	male body	32054510	8008825	28896725	301865	32356375	99.07	24.75	89.31	0.93
V046			D. yakuba	embryo	3051610	1634797	2697080	408232	3459842	88.2	47.25	77.95	11.8
V052			D. yakuba	head	2597536	1936592	2079991	326041	2923577	88.85	66.24	71.15	11.15
M026			D. yakuba	head	7210640	4575485	5911285	427201	7637841	94.41	59.91	77.39	5.59
M043			D. yakuba	female body	50519606	19515466	27342967	18062900	68582506	73.66	28.46	39.87	26.34
M056			D. yakuba	embryo	31908318	12098913	21952003	434824	32343142	98.66	37.41	67.87	1.34
											Fraction of reads mapping perfect to the genome	67.357
											STD DEV	13.7333
											MEAN - 1 STDEV	53.6237
											MEAN + 1 STDEV	81.0903
