# Supplementary material for: Deep experimental profiling of microRNA diversity, deployment, and evolution across the Drosophila genus
Source: HighWire-hosted journal article supplement (doi:10.1101/gr.226068.117), 2017-12-12
Supplement: Supplemental_Table_S2.xlsx [file Supplemental_Table_S2.xlsx]

## Sheet: TableS2A_Dmel_external_libs
Library_ID	Alternate_Name	Description	mapped	mapped_uniqueperfect	mapped_perfect	unmapped	total	mapped_per	mapped_uniqueperfect_per	mapped_perfect_per	unmapped_per
GSM154618		Ovary	4721	869	4716	13	4734	99.73	18.36	99.62	0.27
GSM154620		Ovary	17619	3557	17590	90	17709	99.49	20.09	99.33	0.51
GSM154621		Ovary	23138	2451	23040	238	23376	98.98	10.49	98.56	1.02
GSM154622		Ovary	14844	1930	14803	29	14873	99.81	12.98	99.53	0.19
GSM180328		Head	131538	76567	94429	16820	148358	88.66	51.61	63.65	11.34
GSM180329		Mixed-body	116358	31704	76286	13507	129865	89.6	24.41	58.74	10.4
GSM180330		embryo_0-1hr	140029	26432	102348	14286	154315	90.74	17.13	66.32	9.26
GSM180331		embryo_2-6hr	171330	43711	122897	17088	188418	90.93	23.2	65.23	9.07
GSM180332		embryo_6-10hr	68112	23264	52477	2892	71004	95.93	32.76	73.91	4.07
GSM180333		embryo_12-24hr	129466	32836	99713	7708	137174	94.38	23.94	72.69	5.62
GSM180334		Larvae	146457	16886	109925	9792	156249	93.73	10.81	70.35	6.27
GSM180335		Disc	178374	29599	142700	7694	186068	95.86	15.91	76.69	4.14
GSM180336		Pupae	103235	14813	72396	10935	114170	90.42	12.97	63.41	9.58
GSM239041		Head	103723	64503	91125	2253	105976	97.87	60.87	85.99	2.13
GSM239050		Head	39904	19337	29036	2450	42354	94.22	45.66	68.56	5.78
GSM239051		S2	103005	23397	70001	10704	113709	90.59	20.58	61.56	9.41
GSM239052		S2	96063	48934	78875	2940	99003	97.03	49.43	79.67	2.97
GSM246084		Head	26421	16321	19891	3334	29755	88.8	54.85	66.85	11.2
GSM280082		Ovary	1062318	316837	908878	12244	1074562	98.86	29.49	84.58	1.14
GSM280083		Ovary	1231046	351814	1016338	20332	1251378	98.38	28.11	81.22	1.62
GSM280084		Ovary	2394133	284989	1947452	96078	2490211	96.14	11.44	78.2	3.86
GSM280085		Testis	665275	367358	555392	7749	673024	98.85	54.58	82.52	1.15
GSM280086		Ovary	12587	1081	3160	2055	14642	85.97	7.38	21.58	14.03
GSM280087	GSM280087	S2-NP	1812544	567230	923423	121261	1933805	93.73	29.33	47.75	6.27
GSM280088	GSM280088	S2-NP	2382894	1772116	2074529	13703	2396597	99.43	73.94	86.56	0.57
GSM312995		Head	651578	617363	651578	0	651578	100	94.75	100	0
GSM313160		Head	1851375	1751775	1851375	0	1851375	100	94.62	100	0
GSM313161		Head	2127811	2077767	2127811	0	2127811	100	97.65	100	0
GSM313162		Head	1483060	1414898	1483060	0	1483060	100	95.4	100	0
GSM313163		Head	1780131	1707302	1780131	0	1780131	100	95.91	100	0
GSM313164		Head	1806806	1790938	1806806	0	1806806	100	99.12	100	0
GSM313165		Head	1864844	1848494	1864844	0	1864844	100	99.12	100	0
GSM343287		mixed_embryo	3800197	377805	1133404	1191313	4991510	76.13	7.57	22.71	23.87
GSM379050		Ovary	2271030	617412	1865989	29774	2300804	98.71	26.83	81.1	1.29
GSM379051		Ovary	1751726	736563	1461456	13601	1765327	99.23	41.72	82.79	0.77
GSM379052		Ovary	2193333	658924	1760443	62812	2256145	97.22	29.21	78.03	2.78
GSM379053		Ovary	2377436	501689	1900857	13594	2391030	99.43	20.98	79.5	0.57
GSM379054		Ovary	2346993	674005	1953211	24056	2371049	98.99	28.43	82.38	1.01
GSM379055		Ovary	1432952	229168	1092734	23697	1456649	98.37	15.73	75.02	1.63
GSM379056		Ovary	2507795	686605	1776844	53546	2561341	97.91	26.81	69.37	2.09
GSM379057		Ovary	3068104	1176161	2351649	46936	3115040	98.49	37.76	75.49	1.51
GSM379058		Ovary	2806576	588617	2433454	15636	2822212	99.45	20.86	86.23	0.55
GSM379059		Ovary	2518145	293586	2172486	26761	2544906	98.95	11.54	85.37	1.05
GSM379060		Ovary	3011371	788168	2566624	23877	3035248	99.21	25.97	84.56	0.79
GSM379061		Ovary	1693010	650866	1303938	26710	1719720	98.45	37.85	75.82	1.55
GSM379062		Ovary	2238148	719477	1789801	24035	2262183	98.94	31.8	79.12	1.06
GSM379063		Ovary	2908321	935796	2033665	42939	2951260	98.55	31.71	68.91	1.45
GSM379064		Ovary	2813198	1098656	2270972	24239	2837437	99.15	38.72	80.04	0.85
GSM379065		Ovary	3188853	1384904	2605040	24032	3212885	99.25	43.1	81.08	0.75
GSM379066		Ovary	2875927	969846	2453476	26966	2902893	99.07	33.41	84.52	0.93
GSM379067		Ovary	1325879	318680	970029	22295	1348174	98.35	23.64	71.95	1.65
GSM424739		S2	1096837	544372	950469	1165	1098002	99.89	49.58	86.56	0.11
GSM424740		S2	2673153	1337355	2411905	5518	2678671	99.79	49.93	90.04	0.21
GSM424741		S2	195316	102846	163669	4102	199418	97.94	51.57	82.07	2.06
GSM467729		Female-body	3167397	1472842	2443426	0	3167397	100	46.5	77.14	0
GSM467730		Female-body	2172705	823467	1683219	0	2172705	100	37.9	77.47	0
GSM467731		Female-body	1707312	770770	1310472	0	1707312	100	45.15	76.76	0
GSM385744		OSS	5223626	1888858	3877947	388718	5612344	93.07	33.66	69.1	6.93
GSM385748		OSS	5460244	1970928	4048583	410460	5870704	93.01	33.57	68.96	6.99
GSM385821		OSS	4069695	1491086	3071905	296285	4365980	93.21	34.15	70.36	6.79
GSM385822		OSS	4505630	1586371	3217042	363245	4868875	92.54	32.58	66.07	7.46
GSM286601		Head	453226	170095	200452	21416	474642	95.49	35.84	42.23	4.51
GSM286605		embryo_2-6hr	3399148	809278	2480038	244743	3643891	93.28	22.21	68.06	6.72
GSM286606		embryo_2-6hr	1184951	190915	498635	378518	1563469	75.79	12.21	31.89	24.21
GSM286607		embryo_6-10hr	1656434	464125	1103675	279048	1935482	85.58	23.98	57.02	14.42
GSM286611		embryo_6-10hr	1532553	416033	1031645	97663	1630216	94.01	25.52	63.28	5.99
GSM286613		embryo_0-1hr	2316942	485664	1769446	97581	2414523	95.96	20.11	73.28	4.04
GSM272652		S2-GMR	2315916	727688	1494119	119791	2435707	95.08	29.88	61.34	4.92
GSM272653		Kc	1949106	485609	1030076	244698	2193804	88.85	22.14	46.95	11.15
GSM322245		Larvae	541253	104760	267759	42617	583870	92.7	17.94	45.86	7.3
GSM322208		Larvae	2432998	111226	1997154	48562	2481560	98.04	4.48	80.48	1.96
GSM322219		Pupae	1868974	403622	941918	172458	2041432	91.55	19.77	46.14	8.45
GSM240749		Head	885546	364652	436457	35712	921258	96.12	39.58	47.38	3.88
GSM322338		Pupae	2007115	89882	1596394	35750	2042865	98.25	4.4	78.14	1.75
GSM399105		Disc	2156859	319476	1759860	43308	2200167	98.03	14.52	79.99	1.97
GSM322533		Head	1632555	854447	1083814	69929	1702484	95.89	50.19	63.66	4.11
GSM399106		Female-body	3031519	679499	1958825	266650	3298169	91.92	20.6	59.39	8.08
GSM399107		Male-body	3939989	1250046	2828803	134148	4074137	96.71	30.68	69.43	3.29
GSM360256		Larvae	3906647	271680	3470778	82474	3989121	97.93	6.81	87.01	2.07
GSM360257		Larvae	3671192	245925	3284206	83465	3754657	97.78	6.55	87.47	2.22
GSM360260		Pupae	3946716	434608	3117710	163950	4110666	96.01	10.57	75.84	3.99
GSM360262		Pupae	3989394	638299	2986134	261593	4250987	93.85	15.02	70.25	6.15
GSM322543		Head	4121884	2478724	3034043	386051	4507935	91.44	54.99	67.3	8.56
GSM286602		Male-body	773112	151173	352268	28962	802074	96.39	18.85	43.92	3.61
GSM361908		S2-GMR	3728592	1299668	2292459	292754	4021346	92.72	32.32	57.01	7.28
GSM609241		S2	3825658	1291776	2275507	313920	4139578	92.42	31.21	54.97	7.58
GSM609242		S2	5961178	2053008	3696602	371058	6332236	94.14	32.42	58.38	5.86
GSM399110		Kc	5878471	1515225	3162875	858429	6736900	87.26	22.49	46.95	12.74
GSM609243		Kc	1634692	343737	845803	295294	1929986	84.7	17.81	43.82	15.3
GSM609244		Kc	1965488	448796	999007	184630	2150118	91.41	20.87	46.46	8.59
GSM286603		Female-body	840894	185081	561778	64449	905343	92.88	20.44	62.05	7.12
GSM275691		Disc	1315037	219248	1152703	12238	1327275	99.08	16.52	86.85	0.92
GSM364902		embryo_12-24hr	465998	131872	397006	6347	472345	98.66	27.92	84.05	1.34
GSM272651		S2	669937	221388	391946	44399	714336	93.78	30.99	54.87	6.22
GSM286604		embryo_0-1hr	3652611	733278	2632110	232684	3885295	94.01	18.87	67.75	5.99
SRR001337	GSM278573	Head	196805	48238	61487	47448	244253	80.57	19.75	25.17	19.43
SRR001338	GSM278707	Head	2081298	1131532	1300127	140760	2222058	93.67	50.92	58.51	6.33
SRR001339	GSM278706	Head	2246630	758270	954686	440822	2687452	83.6	28.22	35.52	16.4
SRR001340	GSM278575	Head	136041	16683	32434	63532	199573	68.17	8.36	16.25	31.83
SRR001341	GSM278695	Head	621281	342686	399180	55444	676725	91.81	50.64	58.99	8.19
SRR001342	GSM278574	Head	10396	3370	5134	3145	13541	76.77	24.89	37.91	23.23
SRR001343	GSM278696	Head	512571	349272	409565	21729	534300	95.93	65.37	76.65	4.07
SRR001344	GSM278692	Head	377251	236030	288715	41700	418951	90.05	56.34	68.91	9.95
SRR001345	GSM278708	Head	1655834	1183640	1384478	72336	1728170	95.81	68.49	80.11	4.19
SRR001346	GSM278648	Head	66098	20306	29826	20620	86718	76.22	23.42	34.39	23.78
SRR001347	GSM278704	Head	4000729	672410	1012743	1046797	5047526	79.26	13.32	20.06	20.74
SRR001348	GSM278693	Head	1664724	96382	232832	451438	2116162	78.67	4.55	11	21.33
SRR001349	GSM278705	Head	4513226	850314	1085090	1106023	5619249	80.32	15.13	19.31	19.68
SRR001664	GSM278703	Head	3497198	687470	1026259	717863	4215061	82.97	16.31	24.35	17.03
SRR010951	SRX002202	Ovary	1905752	330547	1574974	58547	1964299	97.02	16.83	80.18	2.98
SRR010952	SRX002237	Ovary	878281	101817	742548	12495	890776	98.6	11.43	83.36	1.4
SRR010953	SRX002238	Ovary	6554432	371353	4121607	493476	7047908	93	5.27	58.48	7
SRR010954	SRX002239	Ovary	5787229	296518	3674403	478128	6265357	92.37	4.73	58.65	7.63
SRR010955	SRX002240	Ovary	2730926	545846	2166375	259614	2990540	91.32	18.25	72.44	8.68
SRR010956	SRX002241	Ovary	2320383	463645	1840689	143397	2463780	94.18	18.82	74.71	5.82
SRR010957	SRX002242	Ovary	2943186	884648	2292612	202346	3145532	93.57	28.12	72.88	6.43
SRR010958	SRX002243	Ovary	2599350	903008	2004221	161164	2760514	94.16	32.71	72.6	5.84
SRR010959	SRX002244	Ovary	4721249	456372	1672664	2051496	6772745	69.71	6.74	24.7	30.29
SRR010960	SRX002245	Ovary	2770953	447343	2244237	94330	2865283	96.71	15.61	78.33	3.29
SRR014268	GSM327627	embryo_0-2hr	6284108	750969	5311593	100149	6384257	98.43	11.76	83.2	1.57
SRR014269	GSM327629	embryo_0-2hr	5592558	1126338	4068762	310450	5903008	94.74	19.08	68.93	5.26
SRR014270	GSM327628	embryo_0-2hr	5692930	1204390	4364984	141269	5834199	97.58	20.64	74.82	2.42
SRR014271	GSM327625	embryo_0-2hr	5016784	1149254	4272214	164791	5181575	96.82	22.18	82.45	3.18
SRR014272	GSM327626	embryo_0-2hr	5056107	755409	4038073	230956	5287063	95.63	14.29	76.38	4.37
SRR014273	GSM327622	Ovary	6331456	1215547	5319852	57847	6389303	99.09	19.02	83.26	0.91
SRR014274	GSM327633	Ovary	6468856	2088012	5165185	70761	6539617	98.92	31.93	78.98	1.08
SRR014275	GSM327624	Ovary	5288497	1556828	4079122	76745	5365242	98.57	29.02	76.03	1.43
SRR014276	GSM327634	Ovary	6712686	2074176	5470791	61699	6774385	99.09	30.62	80.76	0.91
SRR014277	GSM327623	Ovary	5306178	1281962	4198912	89375	5395553	98.34	23.76	77.82	1.66
SRR014278	GSM327632	Ovary	6368022	2548768	4943922	236784	6604806	96.41	38.59	74.85	3.59
SRR014279	GSM327630	Ovary	4170447	1153665	3530961	63947	4234394	98.49	27.25	83.39	1.51
SRR014280	GSM327620	Ovary	5055006	1534061	4459113	46678	5101684	99.09	30.07	87.4	0.91
SRR014281	GSM327631	Ovary	5114898	1741560	4518263	60108	5175006	98.84	33.65	87.31	1.16
SRR014282	GSM327621	Ovary	4680007	934804	3745588	113983	4793990	97.62	19.5	78.13	2.38
SRR023197	GSM180337	S2	114224	33434	68705	14733	128957	88.58	25.93	53.28	11.42
SRR023197	GSM180337	S2	1592753	688940	1433115	83249	1676002	95.03	41.11	85.51	4.97
SRR023399	SRX008034	S2	2310082	494551	2200193	36287	2346369	98.45	21.08	93.77	1.55
SRR023400	SRX008031	S2	2421303	635399	2267246	54280	2475583	97.81	25.67	91.58	2.19
SRR023402	SRX008036	S2	2619245	142535	2251132	48933	2668178	98.17	5.34	84.37	1.83
SRR023407	SRX008041	S2	601186	189086	495445	19768	620954	96.82	30.45	79.79	3.18
SRR029028	GSM430030	S2	6763834	2346871	3793345	334372	7098206	95.29	33.06	53.44	4.71
SRR029029	GSM430031	S2	3397035	976444	1676737	212947	3609982	94.1	27.05	46.45	5.9
SRR029030	GSM430032	S2	1856917	719280	1002026	160116	2017033	92.06	35.66	49.68	7.94
SRR029031	GSM430033	S2	5322045	2133291	2900168	377334	5699379	93.38	37.43	50.89	6.62
SRR029032	GSM430034	S2	3871718	1182325	1943862	261666	4133384	93.67	28.6	47.03	6.33
SRR029033	GSM430035	S2	2934265	788993	1356999	257196	3191461	91.94	24.72	42.52	8.06
SRR029608		Head	7241039	1924950	2540396	2174603	9415642	76.9	20.44	26.98	23.1
SRR029633		Head	8823204	2508650	3558377	2116575	10939779	80.65	22.93	32.53	19.35
SRR030145	GSM450972	bg3	20625	11295	17559	777	21402	96.37	52.78	82.04	3.63
SRR031692	GSM466487	Head	8223047	1597194	2829344	3265360	11488407	71.58	13.9	24.63	28.42
SRR031693	GSM466488	Head	2036815	1539215	1624565	18682	2055497	99.09	74.88	79.04	0.91
SRR031694	GSM466488	Head	964765	723135	766983	11799	976564	98.79	74.05	78.54	1.21
SRR031696	GSM466489	Head	1496984	1171232	1267160	44605	1541589	97.11	75.98	82.2	2.89
SRR031697	GSM466490	Head	6361499	2271096	3751285	623410	6984909	91.07	32.51	53.71	8.93
SRR031698	GSM466491	Head	4310155	2370459	2673484	212876	4523031	95.29	52.41	59.11	4.71
SRR031699	GSM466492	Head	3071667	1608144	2170065	195339	3267006	94.02	49.22	66.42	5.98
SRR031700	GSM466493	Head	3577051	1977861	2333214	153199	3730250	95.89	53.02	62.55	4.11
SRR031701	GSM466494	Head	8813683	1661148	2131396	3561840	12375523	71.22	13.42	17.22	28.78
SRR031702	GSM466495	Head	8961561	726837	979001	1992595	10954156	81.81	6.64	8.94	18.19
SRR031703	GSM466496	Head	9258992	2443013	3432827	3118454	12377446	74.81	19.74	27.73	25.19
SRR031704	GSM466497	Head	3639912	503769	1091720	4180336	7820248	46.54	6.44	13.96	53.46
SRR032092	GSM442732	S2	6945999	1630932	3712944	208850	7154849	97.08	22.79	51.89	2.92
SRR032093	GSM442733	S2	3183485	842878	1340353	344214	3527699	90.24	23.89	38	9.76
SRR032094	GSM442734	S2	3759669	747264	1457733	569382	4329051	86.85	17.26	33.67	13.15
SRR032095	GSM442735	S2-NP	6513174	4931985	5866096	37145	6550319	99.43	75.29	89.55	0.57
SRR032096	GSM442736	S2-NP	6497082	2139237	3754575	237352	6734434	96.48	31.77	55.75	3.52
SRR032152	GSM466489	Head	5759226	3850187	4121359	353688	6112914	94.21	62.98	67.42	5.79
SRR060643	GSM548582	Testis	3783375	1116894	3321838	53818	3837193	98.6	29.11	86.57	1.4
SRR060644	GSM548583	Ovary	3920194	1101057	3453029	39890	3960084	98.99	27.8	87.2	1.01
SRR060645	GSM548584	Testis	6534581	1364418	3472048	361854	6896435	94.75	19.78	50.35	5.25
SRR060646	GSM548585	Ovary	6832586	1288024	5271449	175983	7008569	97.49	18.38	75.21	2.51
SRR060647	GSM548586	Ovary	5447770	528630	5028799	43068	5490838	99.22	9.63	91.59	0.78
SRR060648	GSM548587	Ovary	4803846	689116	4154309	55903	4859749	98.85	14.18	85.48	1.15
SRR060649	GSM548588	Ovary	3882297	778225	3278269	64770	3947067	98.36	19.72	83.06	1.64
SRR060650	GSM548589	Testis	2159473	655480	1833808	53608	2213081	97.58	29.62	82.86	2.42
SRR060651	GSM548590	Ovary	4673484	555692	4060982	183496	4856980	96.22	11.44	83.61	3.78
SRR060652	GSM548591	Testis	7176830	1599625	3694002	204777	7381607	97.23	21.67	50.04	2.77
SRR060653	GSM548592	Ovary	6346938	1678149	5236431	80549	6427487	98.75	26.11	81.47	1.25
SRR065151	GSM577958	Ovary	8764108	1565907	7410260	407139	9171247	95.56	17.07	80.8	4.44
SRR065152	GSM577959	Ovary	6350863	959700	5133982	710359	7061222	89.94	13.59	72.71	10.06
SRR065153	GSM577960	Ovary	4461751	718750	3628183	275135	4736886	94.19	15.17	76.59	5.81
SRR065154	GSM577961	Ovary	5824645	838864	4546174	1821949	7646594	76.17	10.97	59.45	23.83
SRR065155	GSM577962	Ovary	12039542	2215591	10483988	511908	12551450	95.92	17.65	83.53	4.08
SRR065800	GSM593297	Ovary	5492656	764652	4379415	260824	5753480	95.47	13.29	76.12	4.53
SRR065801	GSM593298	Ovary	6110994	1449468	5070150	129334	6240328	97.93	23.23	81.25	2.07
SRR065802	GSM593299	Ovary	3129203	227922	2419796	129014	3258217	96.04	7	74.27	3.96
SRR065803	GSM593300	Ovary	2757514	399874	1934706	86439	2843953	96.96	14.06	68.03	3.04
SRR065804	GSM593301	Ovary	6667121	250300	4146001	179392	6846513	97.38	3.66	60.56	2.62
SRR065805	GSM593302	Ovary	7168304	604545	6444605	44002	7212306	99.39	8.38	89.36	0.61
SRR065806	GSM593303	Ovary	5805708	957114	4901465	81805	5887513	98.61	16.26	83.25	1.39
SRR065807	GSM593304	Ovary	7252916	951733	5905946	167993	7420909	97.74	12.83	79.59	2.26
SRR097865	GSM666011	S2-NP	9253038	4180210	5437008	776987	10030025	92.25	41.68	54.21	7.75
SRR097866	GSM666012	S2-NP	8151812	3726752	4970639	679507	8831319	92.31	42.2	56.28	7.69
SRR097867	GSM666013	S2-NP	5952129	2928386	3718502	422359	6374488	93.37	45.94	58.33	6.63
SRR298536	GSM744629	Ovary	17221616	5132608	14655592	361692	17583308	97.94	29.19	83.35	2.06
SRR298537	GSM744630	Ovary	22349936	3949617	19813838	193051	22542987	99.14	17.52	87.89	0.86
SRR298711	GSM744619	Ovary	10175621	1722621	7584649	604087	10779708	94.4	15.98	70.36	5.6
SRR298712	GSM744620	Ovary	14214265	3143620	11643365	464946	14679211	96.83	21.42	79.32	3.17
SRR317110	GSM767594	Ovary	28645705	10039325	26234545	252776	28898481	99.13	34.74	90.78	0.87
SRR317111	GSM767595	Ovary	29919025	3780431	27697622	221208	30140233	99.27	12.54	91.9	0.73
SRR317112	GSM767596	Ovary	29921731	8294206	27077591	418497	30340228	98.62	27.34	89.25	1.38
SRR317113	GSM767597	Ovary	20299353	6876670	17508872	306325	20605678	98.51	33.37	84.97	1.49
SRR317114	GSM767598	Ovary	31191432	10890350	28532188	253611	31445043	99.19	34.63	90.74	0.81
SRR317115	GSM767599	Ovary	27295256	6134619	25042721	297365	27592621	98.92	22.23	90.76	1.08
SRR317116	GSM767600	Ovary	27993202	8726609	25709752	229326	28222528	99.19	30.92	91.1	0.81
SRR317117	GSM767601	Ovary	28874777	8201475	24993427	307530	29182307	98.95	28.1	85.65	1.05
SRR341115	GSM786604	S2	9744620	7173221	8697255	47201	9791821	99.52	73.26	88.82	0.48
SRR341116	GSM786605	S2	7769857	757768	3969237	1118911	8888768	87.41	8.53	44.65	12.59
SRR341117	GSM786606	S2	7765433	3580890	6515083	25910	7791343	99.67	45.96	83.62	0.33
SRR341118	GSM786607	S2	8574500	5977039	7247322	357363	8931863	96	66.92	81.14	4
SRR351332	GSM811191	Mixed-body	17205578	133155	251717	2946069	20151647	85.38	0.66	1.25	14.62
SRR351333	GSM811192	Mixed-body	17234345	259454	360483	4078395	21312740	80.86	1.22	1.69	19.14
GSM609239		embryo_2-18hr	3334910	1308883	2428127	248550	3583460	93.06	36.53	67.76	6.94
GSM609240		embryo_2-18hr	2665033	971815	1898920	193578	2858611	93.23	34	66.43	6.77
GSM609247		Head	3642861	2293230	2766507	146708	3789569	96.13	60.51	73	3.87
GSM609228		S2	6976790	1941553	2848982	1273824	8250614	84.56	23.53	34.53	15.44
GSM609235		CME-L1	5192715	3077983	3723107	341861	5534576	93.82	55.61	67.27	6.18
GSM609217		ML-DmD20-C5	6944503	1757700	2111781	1243792	8188295	84.81	21.47	25.79	15.19
GSM609218		Sg4	4265156	1735763	2511042	538451	4803607	88.79	36.13	52.27	11.21
GSM609251		Head	5666446	3006514	4000234	359786	6026232	94.03	49.89	66.38	5.97
GSM399100		Kc167	6020406	3916500	4797910	264445	6284851	95.79	62.32	76.34	4.21
GSM609219		GM2	6363291	2300032	3594543	1096520	7459811	85.3	30.83	48.19	14.7
GSM343832		S2-R+	5363056	2936412	3797757	333944	5697000	94.14	51.54	66.66	5.86
GSM609220		ML-DmD21	4657810	2556787	3324088	281679	4939489	94.3	51.76	67.3	5.7
GSM399101		Kc167	5084955	2684393	3234985	291984	5376939	94.57	49.92	60.16	5.43
GSM343833		S2-R+	4209372	2379735	2982296	293092	4502464	93.49	52.85	66.24	6.51
GSM609221		1182-2H	4314719	2306246	3054461	185027	4499746	95.89	51.25	67.88	4.11
GSM609249		ML-DmD21	4440076	2845717	3711207	122771	4562847	97.31	62.37	81.34	2.69
GSM609226		CME-W1-Cl.8+	3865607	1815898	2236260	449029	4314636	89.59	42.09	51.83	10.41
GSM609248		ML-DmD9	3922195	2146555	2691274	380931	4303126	91.15	49.88	62.54	8.85
GSM919264		ML-DmD8	3280505	2383877	2770010	96758	3377263	97.14	70.59	82.02	2.86
GSM930140		GM2	3802789	1302690	1589181	1103024	4905813	77.52	26.55	32.39	22.48
GSM609227		CME-W1-Cl.8+	6013757	2060884	2898141	791433	6805190	88.37	30.28	42.59	11.63
GSM919259		ML-DmD16-C3	5759776	2412372	3047691	637442	6397218	90.04	37.71	47.64	9.96
GSM609250		ML-DmD32	5500573	3502602	4439459	211090	5711663	96.3	61.32	77.73	3.7
GSM919261		ML-DmD20-C5	5285048	1345988	1787729	793232	6078280	86.95	22.14	29.41	13.05
GSM609230		Ovary	7386808	3458469	4454703	813952	8200760	90.07	42.17	54.32	9.93
GSM609231		Ovary	7738638	3099006	5209654	606016	8344654	92.74	37.14	62.43	7.26
GSM609236		Ovary	7510826	4118548	5249635	609408	8120234	92.5	50.72	64.65	7.5
GSM609233		Ovary	7422336	3342480	5312700	389676	7812012	95.01	42.79	68.01	4.99
GSM371638		S2-NP	8700641	3609977	4384037	1182618	9883259	88.03	36.53	44.36	11.97
GSM919266		mbn2	13145212	4189360	5597267	1831878	14977090	87.77	27.97	37.37	12.23
GSM915679		S3	13827708	4774941	6337844	1780015	15607723	88.6	30.59	40.61	11.4
GSM609222		ML-DmBG1-C1	15867019	892266	1070746	4429772	20296791	78.18	4.4	5.28	21.82
GSM609225		ML-DmBG3-C2	13171962	4658027	5841284	2238533	15410495	85.47	30.23	37.9	14.53
GSM609229		embryo_2-6hr	14782698	5276517	10474786	872868	15655566	94.42	33.7	66.91	5.58
GSM609238		embryo_14-24hr	15022141	7816191	12269556	474672	15496813	96.94	50.44	79.17	3.06
GSM609223		Male-body	16884601	3873207	12011751	800846	17685447	95.47	21.9	67.92	4.53
GSM609224		Female-body	16356198	2733812	11295382	792317	17148515	95.38	15.94	65.87	4.62
GSM609232		Ovary	13628423	4453624	8515369	932393	14560816	93.6	30.59	58.48	6.4
GSM628271		Ovary	28302090	11188654	22718707	1140395	29442485	96.13	38	77.16	3.87
GSM609237		Ovary	14009394	3842021	8797989	1008618	15018012	93.28	25.58	58.58	6.72
GSM628272		Ovary	29409257	9966091	23268229	1390163	30799420	95.49	32.36	75.55	4.51
GSM609234		Male-body	14007129	6033044	6880241	2497336	16504465	84.87	36.55	41.69	15.13
GSM915680		fGS_OSS	14127240	5264700	7729618	2000523	16127763	87.6	32.64	47.93	12.4
SRX247213		S2-R+	28454512	5338814	12460567	2995247	31449759	90.48	16.98	39.62	9.52
SRX247212		S2-R+	22413701	15312550	19984628	275643	22689344	98.79	67.49	88.08	1.21
GSE24545		Ovary	22182204	11187039	18367855	469212	22651416	97.93	49.39	81.09	2.07
GSE24544		Ovary	22408551	11580788	19434917	301463	22710014	98.67	50.99	85.58	1.33
GSM980236		ML-DmD9	24670042	12873476	18671803	268168	24938210	98.92	51.62	74.87	1.08
GSM915694		CME-L1	26305999	17516348	21988537	748675	27054674	97.23	64.74	81.27	2.77
GSM915681		G2	27859538	13232817	24621866	159594	28019132	99.43	47.23	87.88	0.57
GSM915693		S3	26815632	17052690	22456679	800471	27616103	97.1	61.75	81.32	2.9
GSM980233		ML-DmBG1-C1	22952659	2656017	3494371	6691487	29644146	77.43	8.96	11.79	22.57
GSM980234		ML-DmBG3-C2	26858311	15714546	22405463	1206279	28064590	95.7	55.99	79.84	4.3
SRP021897		ML-DmD16-C3	27264755	13924232	20327908	1336079	28600834	95.33	48.68	71.07	4.67
GSM980232		Sg4	28359310	9782269	20759299	1987022	30346332	93.45	32.24	68.41	6.55
GSM919265		ML-DmD8	30088417	19787049	27449778	41137	30129554	99.86	65.67	91.11	0.14
GSM915695		OSC	28867760	9257222	22455876	1899295	30767055	93.83	30.09	72.99	6.17
GSM980235		S2	22145407	9270132	14354818	2103150	24248557	91.33	38.23	59.2	8.67
GSM980238		1182-2H	22917994	12362104	20341678	56897	22974891	99.75	53.81	88.54	0.25
GSM919267		mbn2	21539850	9186388	13389336	2212355	23752205	90.69	38.68	56.37	9.31
GSM1528798		follicle cells	10112614	782655	7339059	724547	10837161	93.31	7.22	67.72	6.69
GSM980237	V022	ML-DmD32	4894217	2351414	3043629	451605	5345822	91.55	43.99	56.93	8.45
GSM980237	V132	ML-DmD32	29152218	13851703	24734006	86920	29239138	99.7	47.37	84.59	0.3
						Total	1973927399

## Sheet: TableS2B_other_external_libs
fileid	PMID	Species	Tissue	mapped	mapped_unique	mapped_perfect	unmapped	total	mapped_per	mapped_unique_per	mapped_perfect_per	unmapped_per
SRR553485	23559065	D. simulans	ovary	40776739	21612571	35722831	802785	41579524	98.07	51.98	85.91	1.93
SRR553486	23559065	D. simulans	ovary	43886124	20332638	37064438	1109140	44995264	97.53	45.19	82.37	2.47
SRR553487	23559065	D. simulans	ovary	21258852	7884396	16172540	1213998	22472850	94.6	35.08	71.96	5.4
SRR553488	23559065	D. simulans	ovary	15849129	5805423	12320739	691019	16540148	95.82	35.1	74.49	4.18
SRR618934	23189033	D. simulans	ovary	23772821	9244029	19828161	726258	24499079	97.04	37.73	80.93	2.96
SRR902008	24465220	D. simulans	ovary	16431453	5446192	12856331	414603	16846056	97.54	32.33	76.32	2.46
SRR902009	24465220	D. simulans	testis	15454451	8443164	12104743	562236	16016687	96.49	52.71	75.58	3.51
SRR1275483	24951729	D. simulans	male prepupae	60900	29941	40781	11888	72788	83.67	41.13	56.03	16.33
SRR1275485	24951729	D. simulans	male prepupae	17435	8058	10946	2813	20248	86.11	39.8	54.06	13.89
SRR1275487	24951729	D. simulans	male larvae	70805	9773	14876	35089	105894	66.86	9.23	14.05	33.14
SRR1275484	24951729	D. yakuba	male prepupae	143400	21954	36524	22396	165796	86.49	13.24	22.03	13.51
SRR1275486	24951729	D. yakuba	male prepupae	52161	1528	4091	11680	63841	81.7	2.39	6.41	18.3
SRR1275488	24951729	D. yakuba	male larvae	65050	3735	11696	20000	85050	76.48	4.39	13.75	23.52
GSM1528802	Nelson Lau Personal Communication	D. yakuba	follicle cells	12103914	1469882	8700698	542706	12646620	95.71	11.62	68.8	4.29
GSM1528801	Nelson Lau Personal Communication	D. erecta	follicle cells	8213620	1400140	5369283	1686670	9900290	82.96	14.14	54.23	17.04
SRR060654	20581131	D. virilis	ovary	3215058	1265566	2800993	19345	3234403	99.4	39.13	86.6	0.6
SRR060655	20581131	D. virilis	testis	3398608	1343675	2880378	37265	3435873	98.92	39.11	83.83	1.08
SRR060656	20581131	D. virilis	ovary	3408757	1579674	2934812	18343	3427100	99.46	46.09	85.64	0.54
SRR060657	20581131	D. virilis	testis	4488691	987881	3861447	139496	4628187	96.99	21.34	83.43	3.01
SRR060658	20581131	D. virilis	ovary	4910331	1689329	4114013	216854	5127185	95.77	32.95	80.24	4.23
SRR060659	20581131	D. virilis	testis	4790636	1391613	3643462	311858	5102494	93.89	27.27	71.41	6.11
SRR060660	20581131	D. virilis	ovary	3027916	1127328	2463467	168438	3196354	94.73	35.27	77.07	5.27
SRR060661	20581131	D. virilis	embryo	1734017	136625	1173093	235844	1969861	88.03	6.94	59.55	11.97
SRR060662	20581131	D. virilis	embryo	3944593	396742	2525263	507839	4452432	88.59	8.91	56.72	11.41
SRR060663	20581131	D. virilis	embryo	3805707	299309	2537398	427387	4233094	89.9	7.07	59.94	10.1
SRR060664	20581131	D. virilis	male body	4719207	2473450	3447930	269603	4988810	94.6	49.58	69.11	5.4
SRR060665	20581131	D. virilis	female body	4921109	1390807	3817204	280806	5201915	94.6	26.74	73.38	5.4
SRR060666	20581131	D. virilis	male body	3797224	625224	2107081	1071680	4868904	77.99	12.84	43.28	22.01
SRR060667	20581131	D. virilis	female body	3965497	1729277	2552055	462865	4428362	89.55	39.05	57.63	10.45
SRR060668	20581131	D. virilis	male body	2713769	1294963	1580716	449546	3163315	85.79	40.94	49.97	14.21
SRR060669	20581131	D. virilis	female body	2071996	811033	1058896	663357	2735353	75.75	29.65	38.71	24.25
SRR060670	20581131	D. virilis	testis	3784587	1362560	2989959	39977	3824564	98.95	35.63	78.18	1.05
SRR060671	20581131	D. virilis	male body	2796234	1492988	1736678	429464	3225698	86.69	46.28	53.84	13.31
SRR060672	20581131	D. virilis	female body	5023069	2220534	2753048	1068611	6091680	82.46	36.45	45.19	17.54
SRR060673	20581131	D. virilis	ovary	4106717	1652132	3459607	26037	4132754	99.37	39.98	83.71	0.63
SRR060674	20581131	D. virilis	ovary	5372140	1536650	4535397	109267	5481407	98.01	28.03	82.74	1.99
SRR060675	20581131	D. virilis	ovary	6025212	1699157	5232851	172799	6198011	97.21	27.41	84.43	2.79
SRR060676	20581131	D. virilis	ovary	10564037	2982954	9220622	186432	10750469	98.27	27.75	85.77	1.73
SRR060677	20581131	D. virilis	ovary	8120956	2502593	7127421	133244	8254200	98.39	30.32	86.35	1.61
SRR060678	20581131	D. virilis	testis	8219857	3421549	6742579	256038	8475895	96.98	40.37	79.55	3.02
SRR060679	20581131	D. virilis	testis	8467804	3346474	6432113	555475	9023279	93.84	37.09	71.28	6.16
SRR060680	20581131	D. virilis	testis	3330111	1431563	2570978	122201	3452312	96.46	41.47	74.47	3.54
SRR060681	20581131	D. virilis	testis	9457113	4053359	7327829	427111	9884224	95.68	41.01	74.14	4.32
SRR060682	20581131	D. virilis	embryo	5961892	811986	4339168	681542	6643434	89.74	12.22	65.32	10.26
SRR060683	20581131	D. virilis	testis	4759709	1252951	4021412	24991	4784700	99.48	26.19	84.05	0.52
SRR060684	20581131	D. virilis	embryo	6728922	963819	5089244	518164	7247086	92.85	13.3	70.22	7.15
SRR060685	20581131	D. virilis	embryo	6308317	930464	4836820	225404	6533721	96.55	14.24	74.03	3.45
SRR060686	20581131	D. virilis	embryo	6803548	1096305	5098961	482788	7286336	93.37	15.05	69.98	6.63
SRR060687	20581131	D. virilis	embryo	5946383	758220	4205684	744272	6690655	88.88	11.33	62.86	11.12
SRR060688	20581131	D. virilis	ovary	3580389	1263754	3119805	21911	3602300	99.39	35.08	86.61	0.61
SRR060689	20581131	D. virilis	testis	3480217	1622744	2840799	64498	3544715	98.18	45.78	80.14	1.82
SRR1106712	24448446	D. virilis	embryo	7155633	31707	6830296	168930	7324563	97.69	0.43	93.25	2.31
SRR1106713	24448446	D. virilis	embryo	16662709	75238	15591625	728863	17391572	95.81	0.43	89.65	4.19
SRR1106714	24448446	D. virilis	embryo	13058738	76688	12435133	361753	13420491	97.3	0.57	92.66	2.7
SRR1106715	24448446	D. virilis	embryo	10358645	301897	9872493	237389	10596034	97.76	2.85	93.17	2.24
SRR1106716	24448446	D. virilis	embryo	7761367	228564	7263643	349527	8110894	95.69	2.82	89.55	4.31
SRR1106717	24448446	D. virilis	embryo	10589144	326275	10078029	233715	10822859	97.84	3.01	93.12	2.16
SRR1106718	24448446	D. virilis	embryo	8542789	264913	7985664	360088	8902877	95.96	2.98	89.7	4.04
SRR1106719	24448446	D. virilis	embryo	7463530	231057	7120378	193787	7657317	97.47	3.02	92.99	2.53
SRR1106720	24448446	D. virilis	embryo	15114879	453394	14104131	743985	15858864	95.31	2.86	88.94	4.69
SRR1106721	24448446	D. virilis	embryo	8079878	246326	7693763	201813	8281691	97.56	2.97	92.9	2.44
SRR1106722	24448446	D. virilis	embryo	15696285	462804	14628970	734978	16431263	95.53	2.82	89.03	4.47
SRR1106723	24448446	D. virilis	embryo	10213576	274359	9634009	1212991	11426567	89.38	2.4	84.31	10.62
SRR1106724	24448446	D. virilis	embryo	6702028	179453	6195139	1571647	8273675	81	2.17	74.88	19
SRR1106725	24448446	D. virilis	embryo	8313546	225953	7821070	1288217	9601763	86.58	2.35	81.45	13.42
SRR1106726	24448446	D. virilis	embryo	6754568	182386	6208079	2105424	8859992	76.24	2.06	70.07	23.76
SRR1106727	24448446	D. virilis	larvae	7804022	148025	7311298	774829	8578851	90.97	1.73	85.22	9.03
SRR1106728	24448446	D. virilis	larvae	6471980	119644	5931786	1225922	7697902	84.07	1.55	77.06	15.93
SRR1106729	24448446	D. virilis	mixed body	13862783	581735	12878493	1115827	14978610	92.55	3.88	85.98	7.45
SRR1106730	24448446	D. virilis	embryo	37976555	871827	34960410	3016263	40992818	92.64	2.13	85.28	7.36
GSM1528803	Nelson Lau Personal Communication	D. virilis	follicle cells	12444236	670338	8979040	1215095	13659331	91.1	4.91	65.74	8.9
SRR2096013	26241928	D. virilis	ovary_oxidized	18773340	3085673	13827889	480992	19254332	97.5	16.03	71.82	2.5
SRR2096014	26241928	D. virilis	ovary_oxidized	16857421	3429705	12508494	420282	17277703	97.57	19.85	72.4	2.43
SRR2096026	26241928	D. virilis	embryo_0-2h	29764589	2466950	26529746	211818	29976407	99.29	8.23	88.5	0.71
SRR2096038	26241928	D. virilis	embryo_0-2h	25861740	2501275	22848524	202278	26064018	99.22	9.6	87.66	0.78
SRR2096050	26241928	D. virilis	embryo_0-2h	17512282	1893185	15662840	90119	17602401	99.49	10.76	88.98	0.51
SRR2096055	26241928	D. virilis	ovary	13782002	5466240	12528748	260525	14042527	98.14	38.93	89.22	1.86
SRR2096056	26241928	D. virilis	ovary	12994167	5401386	11775087	185069	13179236	98.6	40.98	89.35	1.4
SRR2096057	26241928	D. virilis	ovary	10637715	3786920	9689427	162294	10800009	98.5	35.06	89.72	1.5
SRR2096058	26241928	D. virilis	ovary	8980289	3563386	8135730	137188	9117477	98.5	39.08	89.23	1.5
SRR2096059	26241928	D. virilis	ovary	12836475	5056940	11738839	148877	12985352	98.85	38.94	90.4	1.15
SRR2096060	26241928	D. virilis	ovary	12044349	4750450	10795524	410308	12454657	96.71	38.14	86.68	3.29
SRR2096061	26241928	D. virilis	embryo_0-2h	15503215	1431962	13951532	77297	15580512	99.5	9.19	89.54	0.5
SRR2096072	26241928	D. virilis	embryo_0-2h	8679790	1564926	7615277	210816	8890606	97.63	17.6	85.66	2.37
SRR2096079	26241928	D. virilis	embryo_0-2h	8673524	1507183	7660611	183068	8856592	97.93	17.02	86.5	2.07
SRR2096080	26241928	D. virilis	embryo_0-2h	14639613	2475379	12699669	552913	15192526	96.36	16.29	83.59	3.64
SRR2096081	26241928	D. virilis	embryo_0-2h	18504851	2956036	16135759	651665	19156516	96.6	15.43	84.23	3.4
SRR902010	24465220	D. pseudoobscura	ovary	12779073	4815711	11462731	221420	13000493	98.3	37.04	88.17	1.7
SRR902011	24465220	D. pseudoobscura	testis	10025444	4159524	9041368	2056623	12082067	82.98	34.43	74.83	17.02
SRR902012	24465220	D. pseudoobscura	CNS imaginal disc	13242078	9129174	12813077	91822	13333900	99.31	68.47	96.09	0.69
